# Supplementary material
Source: PubMed Central journal article supplement (PMC5551644)
Supplement: bi6b00566_si_001.pdf [file bi6b00566_si_001.pdf]

## Supporting Material

Binding properties of the TGF-beta co-receptor betaglycan: proposed mechanism for potentiation of  
receptor complex assembly and signaling

Maria Villarreal, Sun Kyung Kim, Lindsey Barron, Ravi Kodali, Jason Baardsnes, Cynthia S. Hinck, Troy  
Krzysiak, Morkos A. Henen, Olga Pakhomova, Valentín Mendoza, Maureen D. O'Connor-McCourt,  
Eileen M. Lafer, Fernando López-Casillas, and Andrew P. Hinck

Figure S1

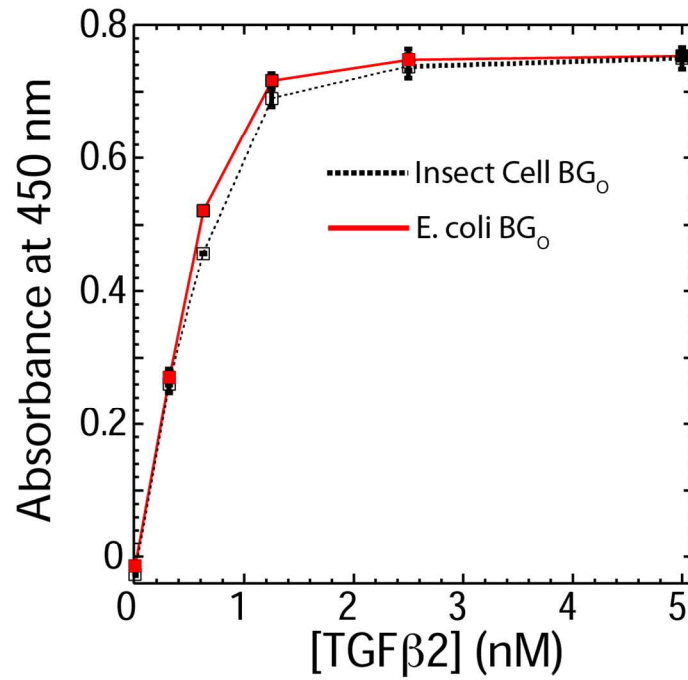

**Figure S1.** Amount of TGF- $\beta$ 2 detected in a sandwich ELISA experiment in which 5  $\mu$ g of insect cell or *E. coli* recombinant BG<sub>0</sub> was coated into the well of an absorbant ELISA plate. Data points shown represent the average of triplicate measurements and correspond to the difference between blank wells with no receptor coated and ones in which receptor (BG<sub>0</sub>) was coated. Other experimental details can be found in Qian, et al [Qian, et al, *J. Biol. Chem.*, 271, 30656-62 (1996)].

Figure S2

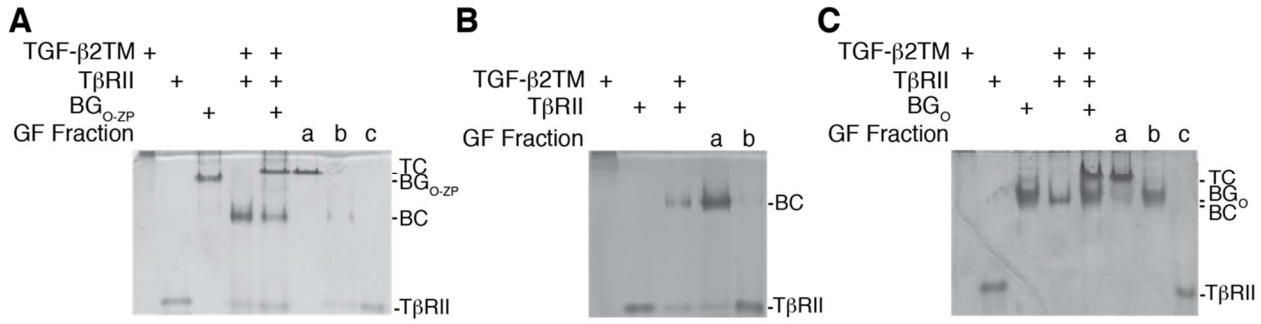

**Figure S2.** Analysis of complexes eluted from size exclusion chromatography runs by native gel electrophoresis. A. Analysis of complexes eluted from the SEC run with TGF-β2TM, TβRII, and BG<sub>O-ZP</sub> (shown in Fig. 4A in the main text) by native gel electrophoresis. Isolated complexes from the SEC column (a, b, and c) are run alongside the mixtures of the individual components as shown on the left side of the panel (+ corresponds to the addition of 1 μg of the component indicated). B-C. Analysis of complexes eluted from the SEC runs with TGF-β2TM and TβRII and TGF-β2TM, TβRII, and BG<sub>O</sub> (shown in Fig. 4B and 6D in the main text) by native gel electrophoresis. Other details are as in panel A, except + corresponds to 4 μg BG<sub>O</sub> in panel C.

Figure S3

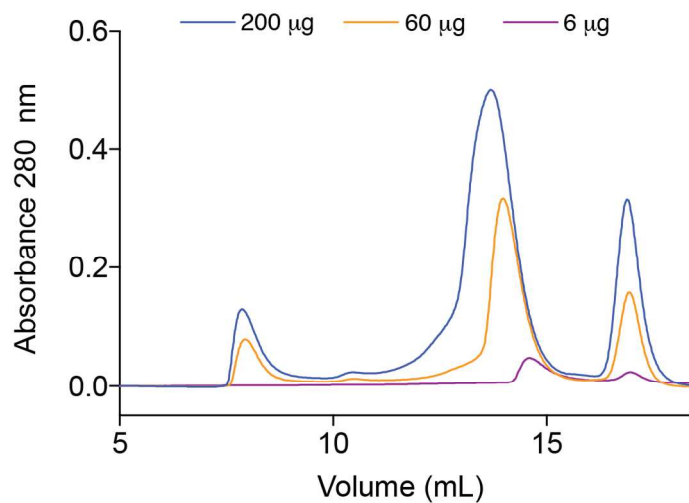

**Figure S3.** Elution profiles for the TGF-β2<sup>TM</sup>:TβRII binary complex on a 1 x 30 cm Superdex 200 Increase 10/300 GL size exclusion column (GE Healthcare, Piscataway, NJ) as a function of the amount of material loaded (blue trace – 200 μg, orange trace - 60 μg, and purple trace – 6 μg). Samples were injected in a volume of 100 μL and each run was performed at a flow rate of 0.5 mL per minute.

Figure S4

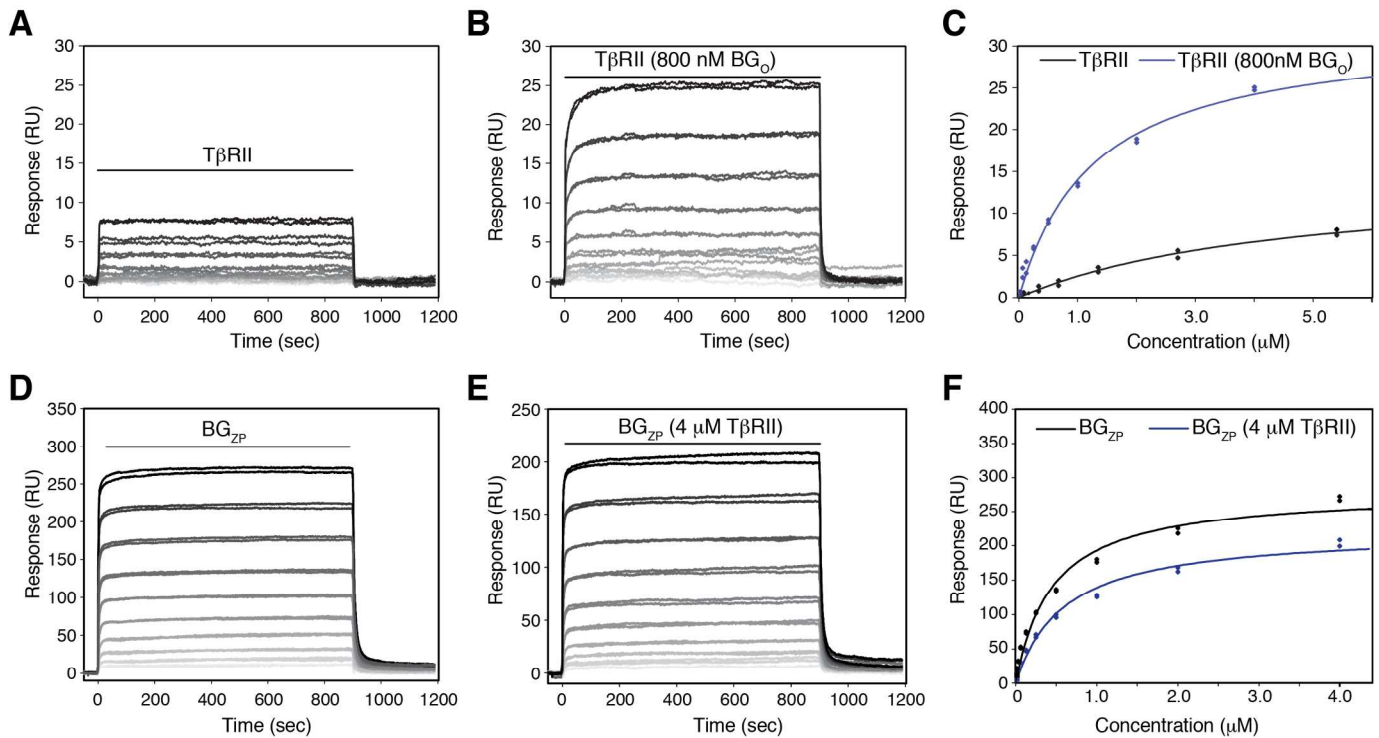

**Figure S4.** Effect of BG<sub>O</sub> and BG<sub>ZP</sub> on binding of TβRII to TGF-β2. A-B. SPR sensorgrams for binding of TβRII to TGF-β2 in the absence (A) and presence (B) of 800nM BG<sub>O</sub>. Black lines over sensorgrams denote the period of injection of a two-fold dilution series of TβRII from 5.4 μM to 0.011 μM (A) or 4 μM to 0.008 μM (B). C. Plot of the equilibrium response for TβRII binding to TGF-β2 in the absence (black) or presence (blue) of 800 nM BG<sub>O</sub>. Equilibrium binding constants were obtained by fitting the equilibrium response as a function of concentration to a standard binding isotherm. Fitted curve is shown by continuous line, solid black or blue in the absence or presence of BG<sub>O</sub>, respectively. D-E. SPR sensorgrams for binding of BG<sub>ZP</sub> to TGF-β2 in the absence (D) or presence (E) of 2 μM TβRII. Black lines over sensorgrams denote the period of injection of a two-fold dilution series of BG<sub>ZP</sub> from 4 μM to 0.008 μM. Other details are as in panels A-B. F. Plot of the equilibrium response for BG<sub>ZP</sub> binding to TGF-β2 in the absence (black) or presence (blue) of 4 μM TβRII. Other details are as in panel C.

Figure S5

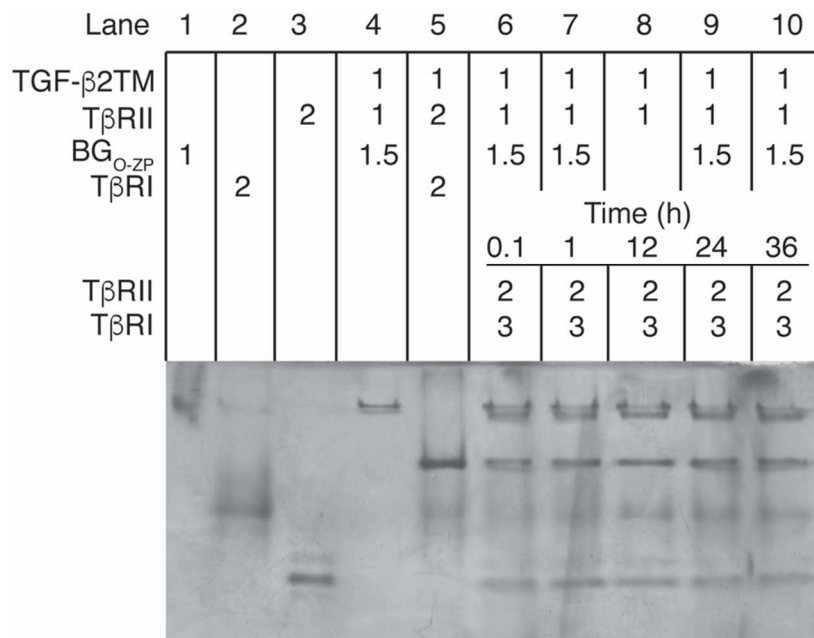

**Figure S5.** Native gel analysis to assess the ability of T $\beta$ RI to displace betaglycan in the context of a TGF- $\beta$ 2TM:T $\beta$ RII:BG<sub>O-ZP</sub> complex to form the TGF- $\beta$ 2TM:T $\beta$ RII:T $\beta$ RI ternary signaling complex. Number shown in the upper part of the lane loading diagram indicate relative molar amounts added. Numbers shown for T $\beta$ RI and T $\beta$ RII in the lower part of the loading diagram indicate relative molar amounts added to the pre-formed TGF- $\beta$ 2TM:T $\beta$ RII:BG<sub>O-ZP</sub> complex specified in the upper part of the loading diagram – samples prepared in this way were incubated at 25 °C for the time period shown before loading onto the native gel (see *Materials and Methods* for other details pertaining to the native gels).

**Table 1.** SPR binding constants for TGF- $\beta$  to betaglycan in the presence of CHAPS\*

| Surface        | Analyte            | CHAPS | $k_{on}$ ( $M^{-1}s^{-1}$ ) | $k_{off}$ ( $s^{-1}$ ) | $K_D$ ( $\mu M$ ) | $R_{max}$ (RU) |
|----------------|--------------------|-------|-----------------------------|------------------------|-------------------|----------------|
| TGF- $\beta$ 2 | BG <sub>O-ZP</sub> | 0     | $2.42 \times 10^5$          | 0.00102                | 0.0042            | 14.3           |
|                | BG <sub>O-ZP</sub> | 15 mM | $2.68 \times 10^5$          | 0.00391                | 0.0146            | 43.9           |
|                | BG <sub>O-ZP</sub> | 30 mM | $6.60 \times 10^5$          | 0.0170                 | 0.0258            | 50.6           |
| TGF- $\beta$ 2 | BG <sub>O</sub>    | 0     | $2.48 \times 10^4$          | 0.0224                 | 0.902             | 51.2           |
|                | BG <sub>O</sub>    | 15 mM | $1.68 \times 10^4$          | 0.0593                 | 3.52              | 12.6           |
|                | BG <sub>O</sub>    | 30 mM | $6.10 \times 10^2$          | 0.0143                 | 23.4              | 17.7           |
| TGF- $\beta$ 2 | BG <sub>ZP-C</sub> | 0     | $2.88 \times 10^4$          | 0.0604                 | 2.10              | 39.7           |
|                | BG <sub>ZP-C</sub> | 15 mM | $5.38 \times 10^4$          | 0.251                  | 4.67              | 29.7           |
|                | BG <sub>ZP-C</sub> | 30 mM | $9.19 \times 10^3$          | 0.036                  | 3.89              | 5.00           |

\*These SPR measurements were performed using TGF- $\beta$ 2 biotinylated in a different manner relative to that used for all other SPR measurements (TGF- $\beta$ 2 for these experiments was biotinylated on lysine residues, while the TGF- $\beta$ s used for all other experiments were biotinylated on aspartate or glutamate residues). The  $K_D$ s measured here for BG<sub>O</sub> and BG<sub>ZP-C</sub> are lower than those reported in for BG<sub>O</sub> and BG<sub>ZP-C</sub> in other experiments, and is therefore likely due to the different manner of biotinylation.
